# Supplementary material
Source: PubMed Central journal article supplement (PMC6619430)
Supplement: NIHMS1528121-supplement-Tables_S2_and_S3.pdf [file NIHMS1528121-supplement-Tables_S2_and_S3.pdf]

**Table S2.** Quantification of Env-specific GC B cells used for BCR sequence analyses, Related to Figures 4 and 5.

| Sorted cells used in BCR analyses |          |                               |
|-----------------------------------|----------|-------------------------------|
|                                   | LN       | GC B (% Env-specific B cells) |
| <b>Bolus</b>                      | 224-13 R | 50.1                          |
|                                   | 224-13 L | 81.2                          |
|                                   | RRk16 R  | 88.7                          |
|                                   | RRk16 L  | 92.9                          |
|                                   | RCn16 R  | 71.7                          |
|                                   | RCn16 L  | 78.7                          |
| <b>2w pumps</b>                   | RQq16 R  | 64.4                          |
|                                   | RQq16 L  | 83.6                          |
|                                   | RVh16 R  | 89.1                          |
|                                   | RVh16 L  | 88.5                          |
|                                   | RWr16 R  | 71.6                          |
|                                   | RWr16 L  | 78.3                          |
|                                   | RYm16 R  | 80.7                          |
|                                   | RYm16 L  | 80.3                          |
| <b>4w pumps</b>                   | RFr16 R  | 81.1                          |
|                                   | RFr16 L  | 86.4                          |
|                                   | ROw16 R  | 68.1                          |
|                                   | ROw16 L  | 50.8                          |
|                                   | RTh16 R  | 71.6                          |
|                                   | RTh16 L  | 68.2                          |
|                                   | RWh16 R  | 89.8                          |
|                                   | RWh16 L  | 85.7                          |

**Table S3.** Sequences of BDA monoclonal antibodies, Related to Figure 5.

| Antibody name | Heavy chain                                                                                                                             | Light chain                                                                                                          |
|---------------|-----------------------------------------------------------------------------------------------------------------------------------------|----------------------------------------------------------------------------------------------------------------------|
| BDA1          | QVQLQESGPGLVKPKSETLSLTCAVSGASISYWWGWI<br>RQPPGKGLEWIGEIIIGSSGSTNSNPSFKSRVTISKDASKNQF<br>SLNLNSVTAADTAVYYCVRVGAAILPFDYWGQGVLT<br>VSS     | SYELTQPPSVSVSPGQTARITCSGDALPKKYAYWFQQKPGQ<br>SPVLIYEDNKRPSGIPERFSGSSSGTVATLTISGAQVEDEGD<br>YYCYSRHSSGNHGLFGGGTRTLTVL |
| BDA2          | QVQLQESGPGLLKPKSETLSLTCAVSGGSFSSYWWSWIR<br>QPPGKGLEWIGEINGNSGTHYNPSLKSRTISKDASKN<br>QFSLKLNSTAAADTAVYYCARWGPTGVTQGEPDFDYW<br>GQGVLTVSS  | SYELTQPPSVSVSPGQTARITYSGDALPKRYAYWFQQKPG<br>QSPVLIYEDSKRPSGIPERFSGSSSGTVATLTISGAQVEDE<br>ADYYCYSTDSSGNHFFGAGTRTLTVL  |
| BDA3          | QVQLQESGPGLVKPKSETLSLTCAVSGHSVSSGYGWI<br>RQPPGKGLEWIGIQIYSGSTSYNPSLKSRTVSTDTSK<br>NQFSLRLSSLTAAADTAVYYCARWHHGSFDIWGPGTPI<br>TVSS        | SYELTQPPSVSVSPGQTARITCSGDALPKKYAYWFQQKPG<br>QSPVLIYEDNKRPSGIPERFSGSSSGTVATLTINGAQVEDE<br>GDYYCYSRHSSGNHGLFGGGTRTLTVL |
| BDA4          | QVQLQESGPGLVKPKSETLSLTCAVSGASIRIYWWGWI<br>RQPPGKGLEWIGEIIIGSSGSTNSNPSFKSRVTISKDASKN<br>QFSLKLNSTAAADTAVYYCVRVGAAILPFDYWGQGV<br>LTVSS    | SSELTQPPSVSVSPGQTARITCSGDALPKKYAYWFQQKPG<br>QSPVLIYEDNKRPSGIPERFSGSSSGTVATLTISGAQVEDE<br>GDFYCYSRHSSGNHGLFGGGTRTLTVL |
| BDA5          | QVQLQESGPGLLKPKSETLSLTCAVSGGSFSSYWWSWIR<br>QPPGKGLEWIGEINGNSGTHYNPSLKSRTISKDASKN<br>HFSLKLNSTAAADTAVYYCARWGPTGVTQGEPDFDYW<br>GQGVLTVSS  | SYELTQPPSVSVSPGQTARITYSGDALPKKYAYWFQQKPG<br>QSPVLIYEDNKRPSGIPERFSGSSSGTVATLTISGAQVEDE<br>ADYYCYSTDSSGNHFFGAGTRTLTVL  |
| BDA6          | QVQLQESGPGLLKPKSETLSLTCAVSGGSFSSYWWSWIR<br>QPPGKGLEWIGEINGNSGTHYNPSLKSRTISKDASKN<br>QFSLKLNSTAAADTAVYYCARWGPTGVTQGEPDFDYW<br>GQGVLTVSS  | SYELTQPPSVSVSPGQTARITCSGDALPKKYVYWFQQKPG<br>QSPVLIYEDSKRPSGIPERFSGSSSGTVATLTISGAQVEDE<br>ADYYCYSTISSGNDRIFGAGTRTLTVL |
| BDA7          | QVQLQESGPGLVKPKSETLSLTCAVSGASISYWWGWI<br>RQPPGKGLEWIGEIIIGNSGSTNSNPSFKSRVTISKDASKNQF<br>SLKLNSTAAADTAVYYCVRVGAAILPFDYWGQGVLT<br>VSS     | SYELTQPPSVSVSPGQTARITCSGDALPKKYAYWFQQKPGQ<br>SPVLIYEDNKRPSGIPERFSGSSSGTVATLTISGAQVEDEGDY<br>YCYSRHSSGNHGLFGGGTRTLTVL |
| BDA8          | QVQLQESGPGLLKPKSETLSLTCAVSGGSFSSYWWSWIR<br>QPPGKGLEWIGEINGNSGNTHYNPSLKSRTISKDASKN<br>QFSLKLNSTAAADTAVYYCARWGPTGVTQGEPEFDY<br>WGQGVLTVSS | SYELTQPPSVSVSPGQTARITYSGDALPKKYAYWFQQKPGQ<br>SPVLIYEDNKRPSGIPERFSGSSSGTVATLTISGAQVEDEADYY<br>CYSTDSSGNHFFGAGTRTLTVL  |
| BDA9          | QVQLQESGPGLLKPKSETLSLTCAVSGGSFSSYWWSWIR<br>QPPGKGLEWIGEINGNSGTHYNPSLKSRTISKDASKN<br>QFSLKLNSTAAADTAVYYCARWGPTGVTQGEPDFDFW<br>GQGVLTVSS  | SYELTQPPSVSVSPGQTARITYSGDALPKRYAYWFQQKPGQ<br>SPVLIYEDSKRPSGIPERFSGSSSGTVATLTISGAQVEDEADY<br>YCYSTDSSGNHFFGVGTRTLTVL  |
| BDA10         | QVQLQESGPGLVKPKSETLSLTCAVSGVSIYWWGWI<br>RQPPGKGLEWIGEIIIGNSGNTNSSPSFKSRVTISKDASKNQF<br>SLKLNSTAAADTAVYYCVRVGAAILPFDYWGQGVLT<br>VSS      | SYELTQPPSVSVSPGQTARITCSGDALPEKYAYWFQQKPGQ<br>SPVLIYDDNIRPSGIPERFSGSSSGTVATLTISGAQVEDEGDY<br>YCYSRHSSGNHGLFGGGTRTLTVL |
| BDA11         | QVQLQESGPGLVKPKSETLSLTCAVSGGSFSSYWWSWIR<br>QPPGKGLEWIGEINGNSGTHYNPSLKSRTISKDASKN<br>QFSLKLNSTAAADTAVYYCARVRVGAAILPFDYWGQ<br>GVLTVSS     | SYELTQPPSVSVSPGQTARITCSGDALPKKYAYWFQQKPGQ<br>SPVLIYEDNKRPSGIPERFSGSSSGTVATLTISGAQVEDEGDY<br>YCYSRHISGNHGLFGGGTRTLTVL |
| BDA12         | BDA1 HC                                                                                                                                 | SYELTQPPSVSVSPGQTARITCSGDALPKKYAYWFQQKPGQ<br>SPVLIYEDNKRPSGIPERFSGSSSGTVATLTISGAQVEDEGDY<br>YCFSRHSSGNHGLFGGGTRTLTVL |
| BDA13         | BDA1 HC                                                                                                                                 | SYELTQPPSVSVSPGQTARITCSGDALPKKYAYWFQQKPGQ<br>SPVLIYDDSQRPSGIPERFSGSSSGTVATLTISGAQVEDEGDY<br>YCFSRHSSGNHGLFGGGTRTLTVL |
