# Supplementary material
Source: PubMed Central journal article supplement (PMC6619430)

**Figure S1**

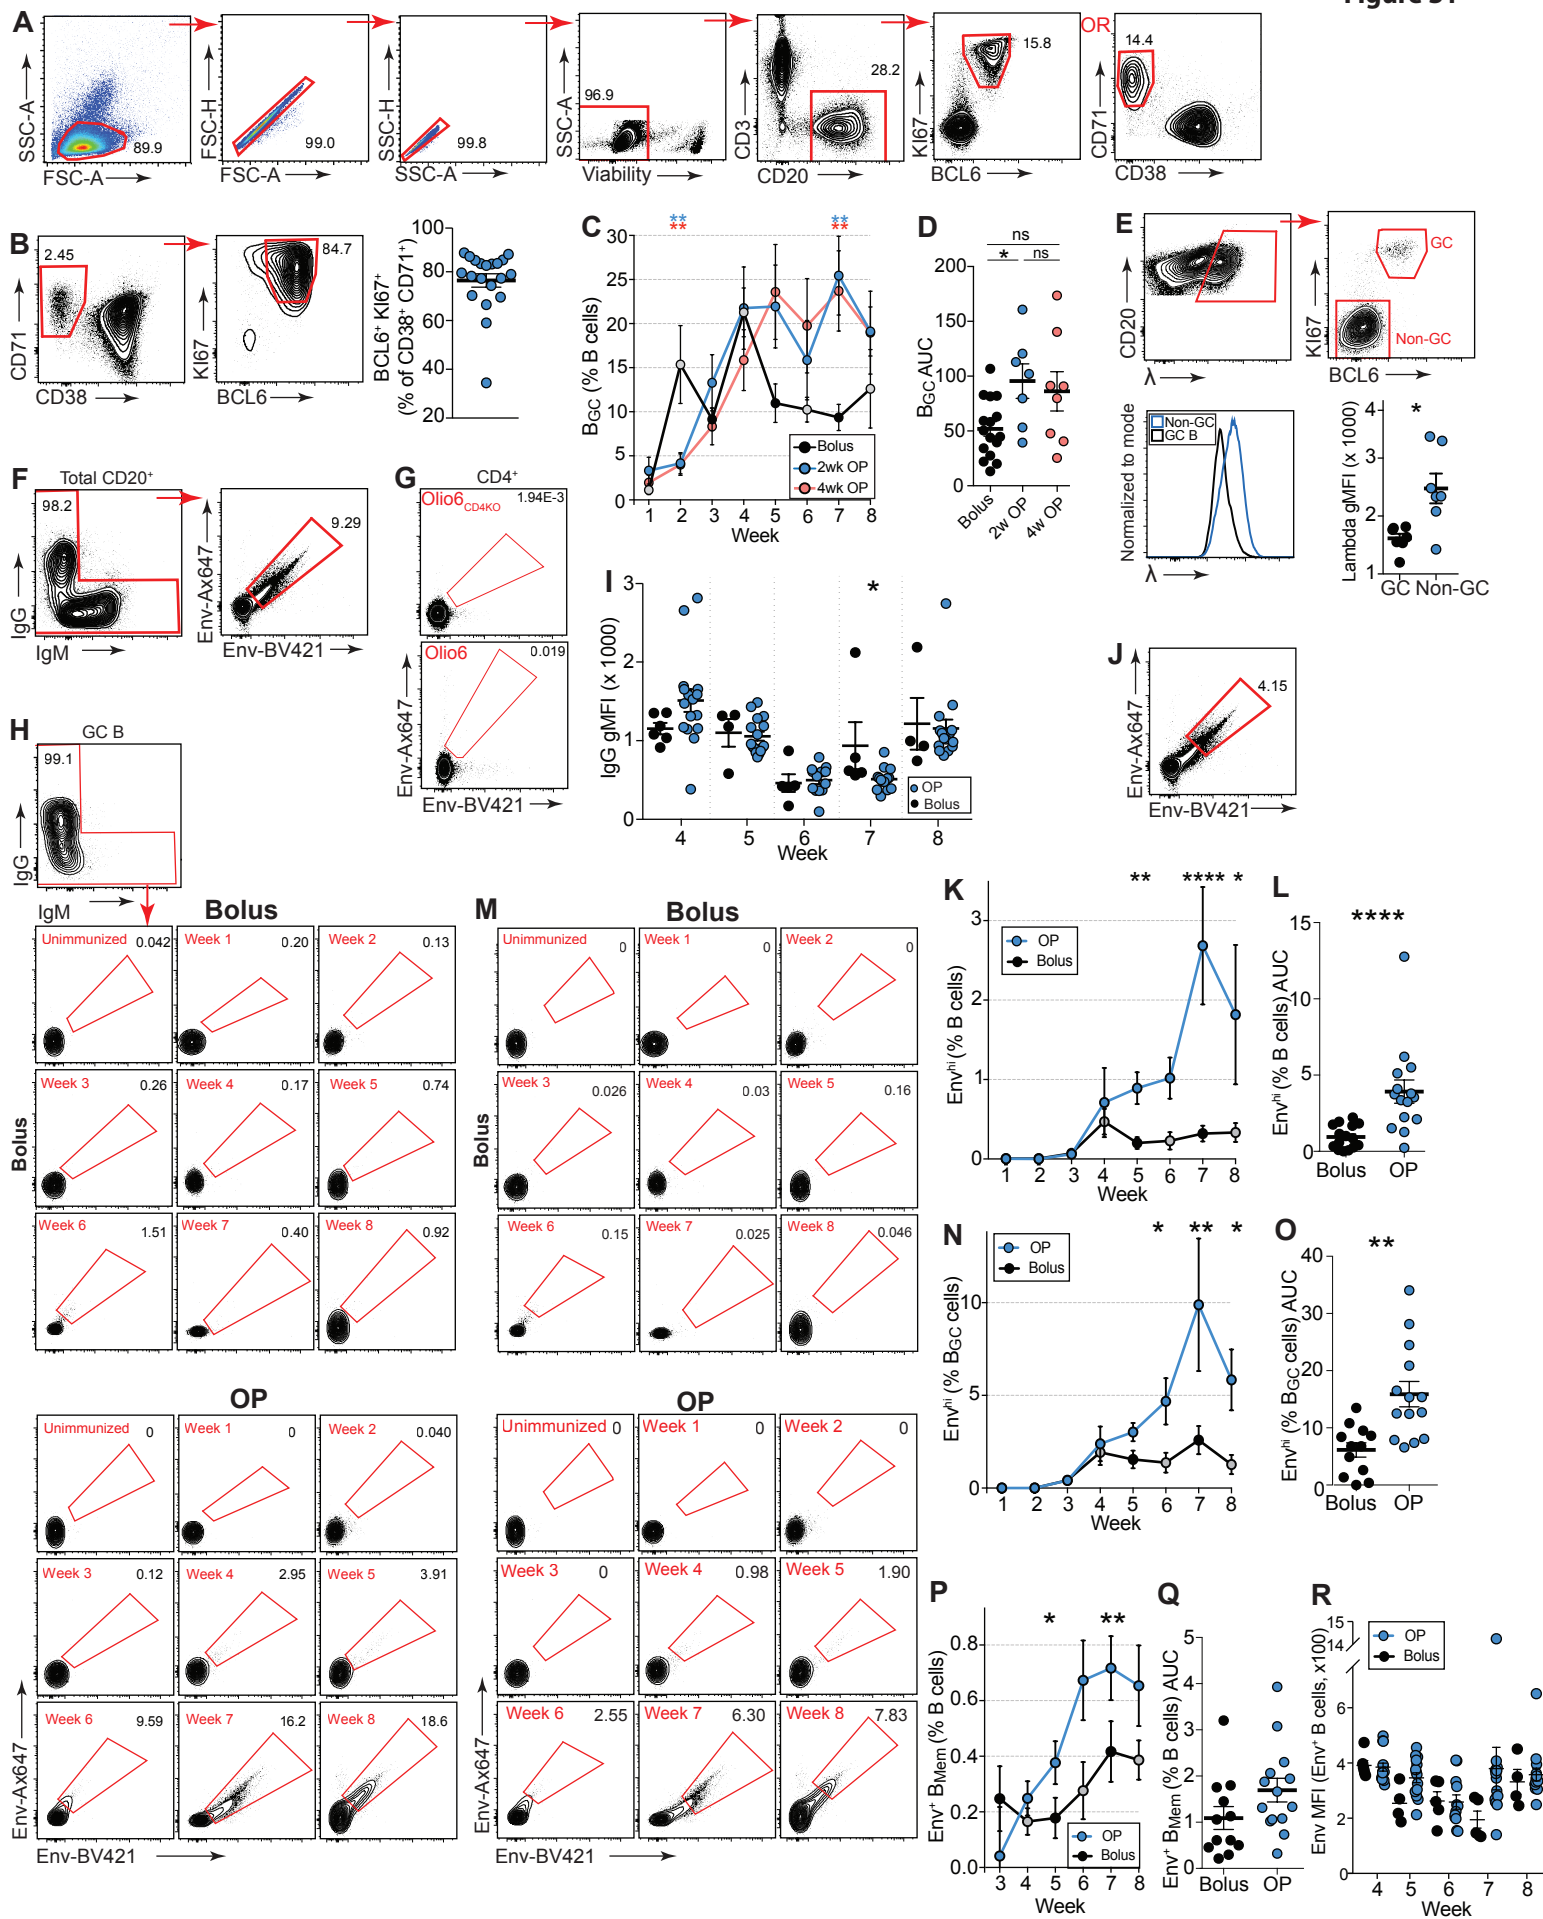

Supplement: NIHMS1528121-supplement-Figure_S1.pdf [file NIHMS1528121-supplement-Figure_S1.pdf]

**Figure S2**

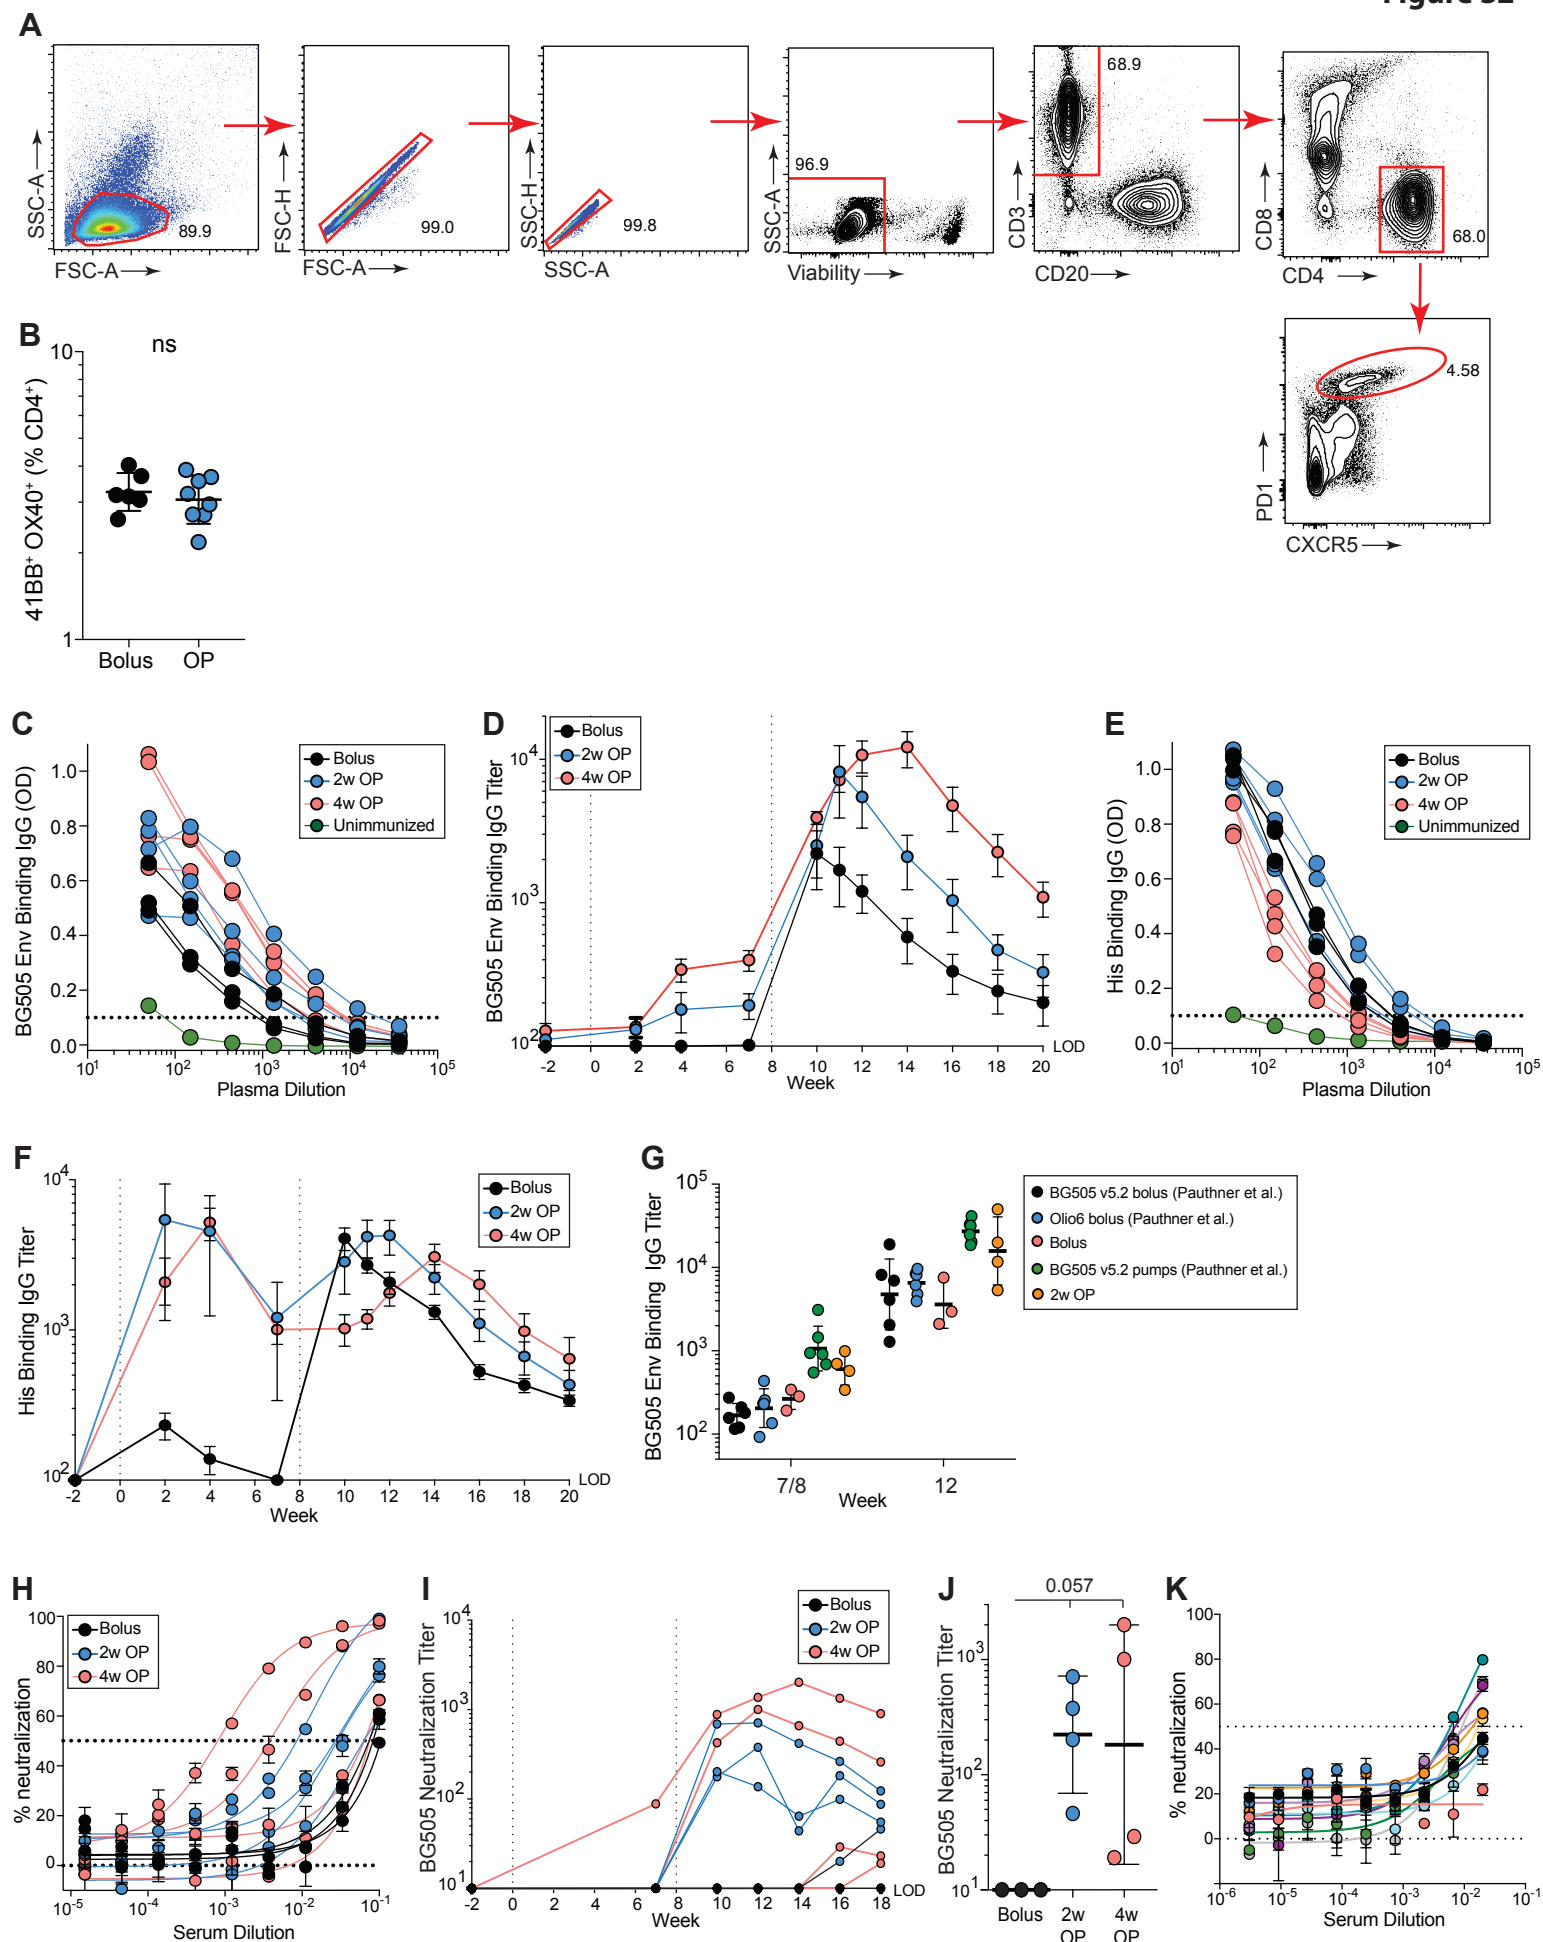

Supplement: NIHMS1528121-supplement-Figure_S2.pdf [file NIHMS1528121-supplement-Figure_S2.pdf]

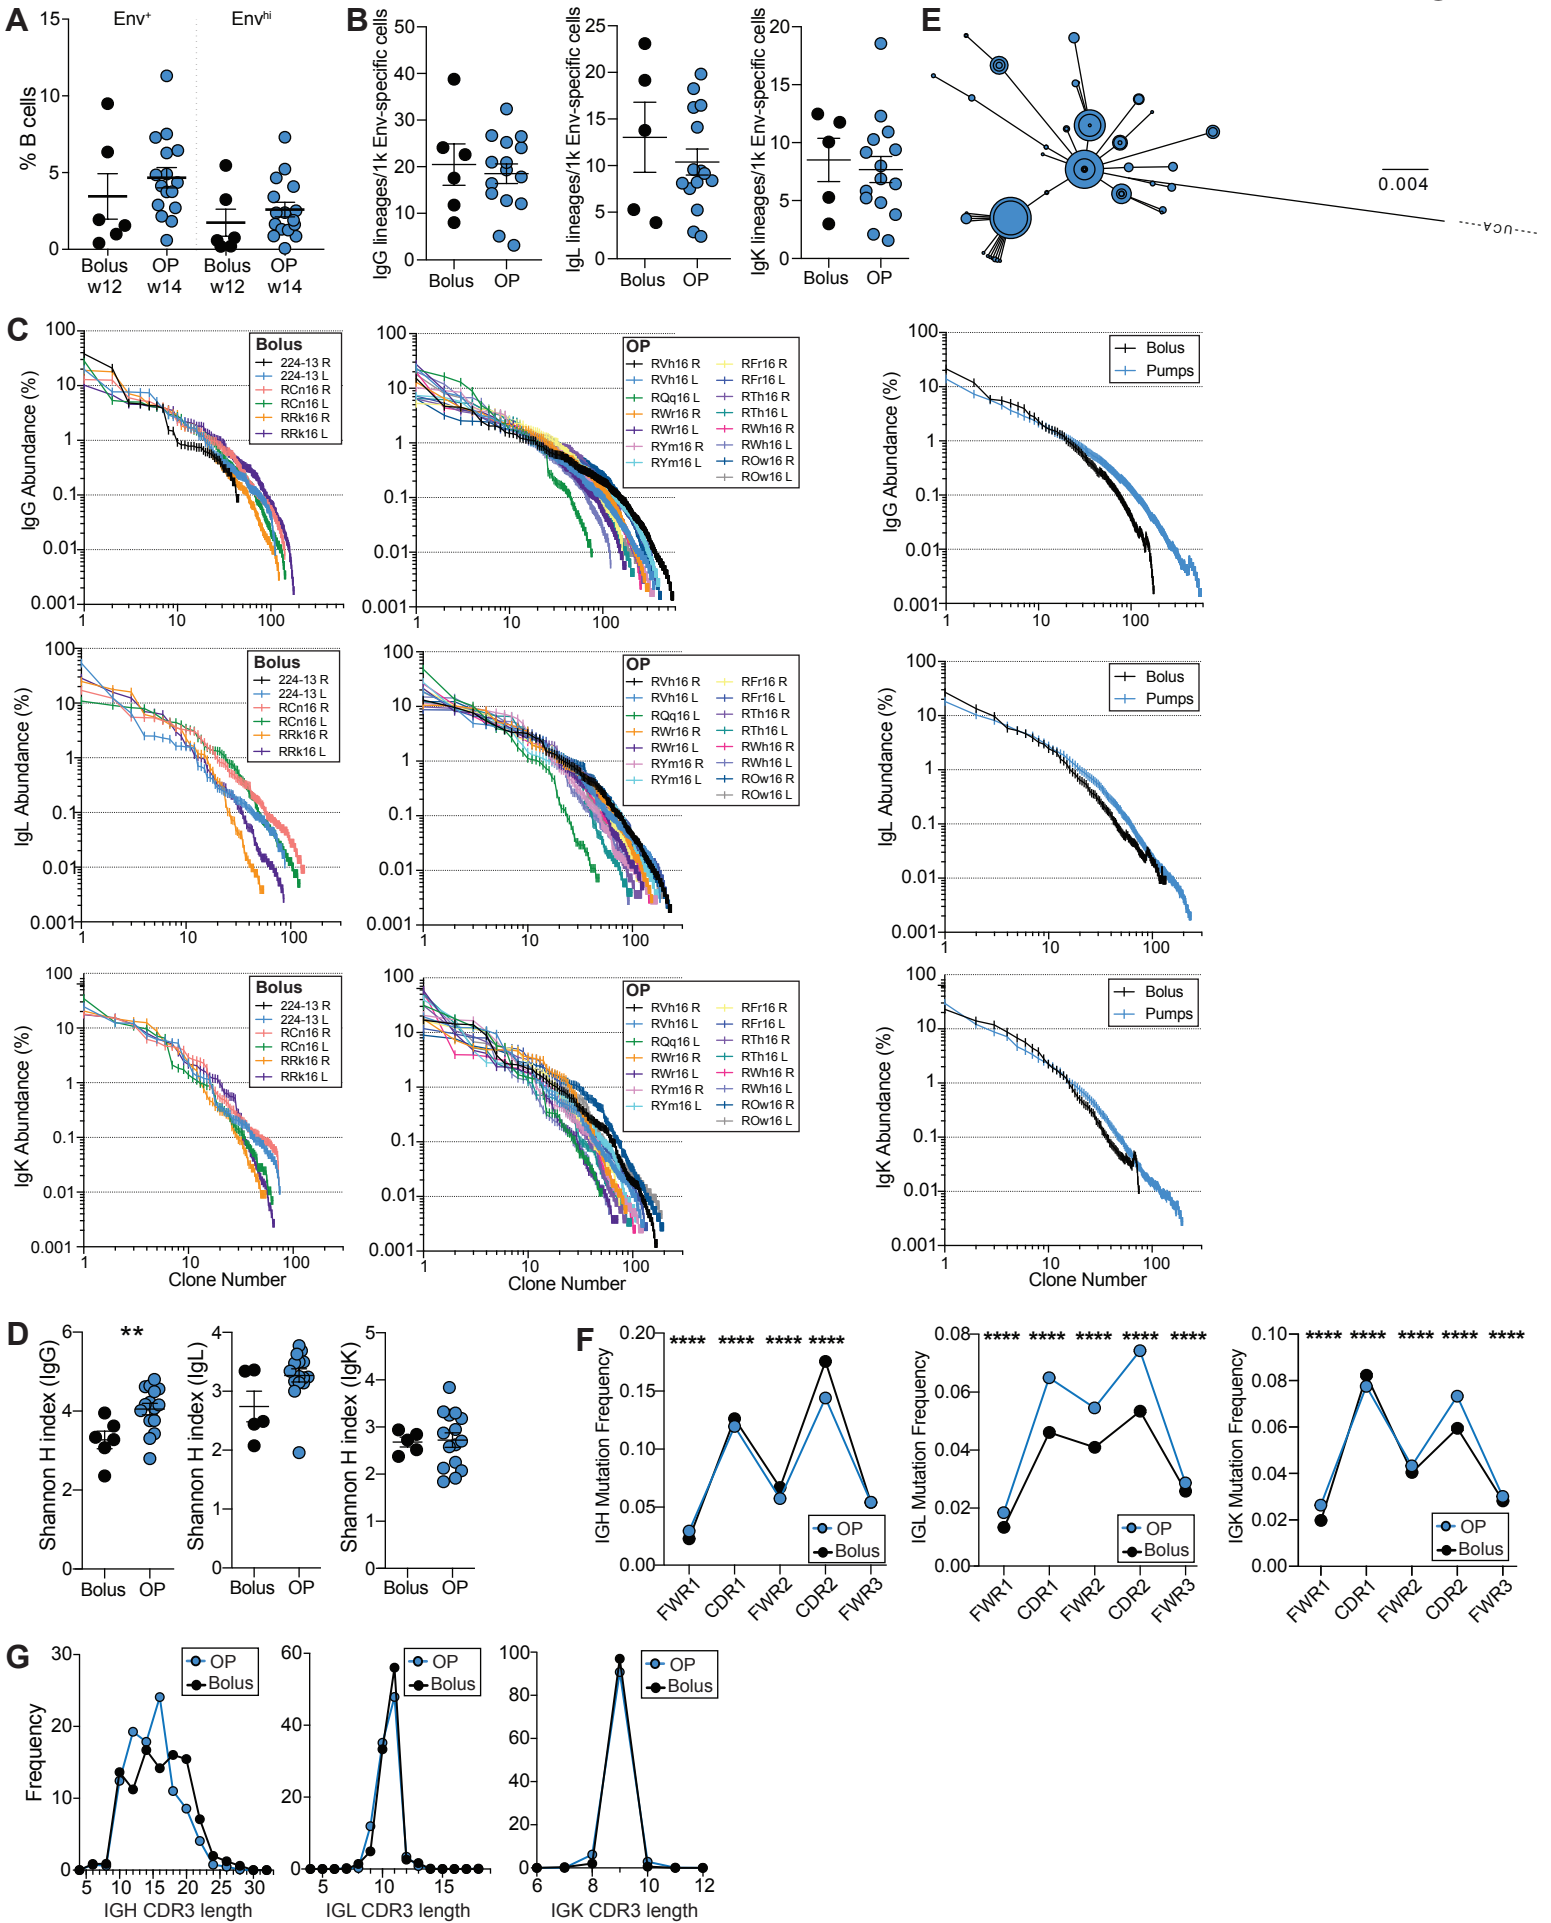

Supplement: NIHMS1528121-supplement-Figure_S3.pdf [file NIHMS1528121-supplement-Figure_S3.pdf]

Figure S4

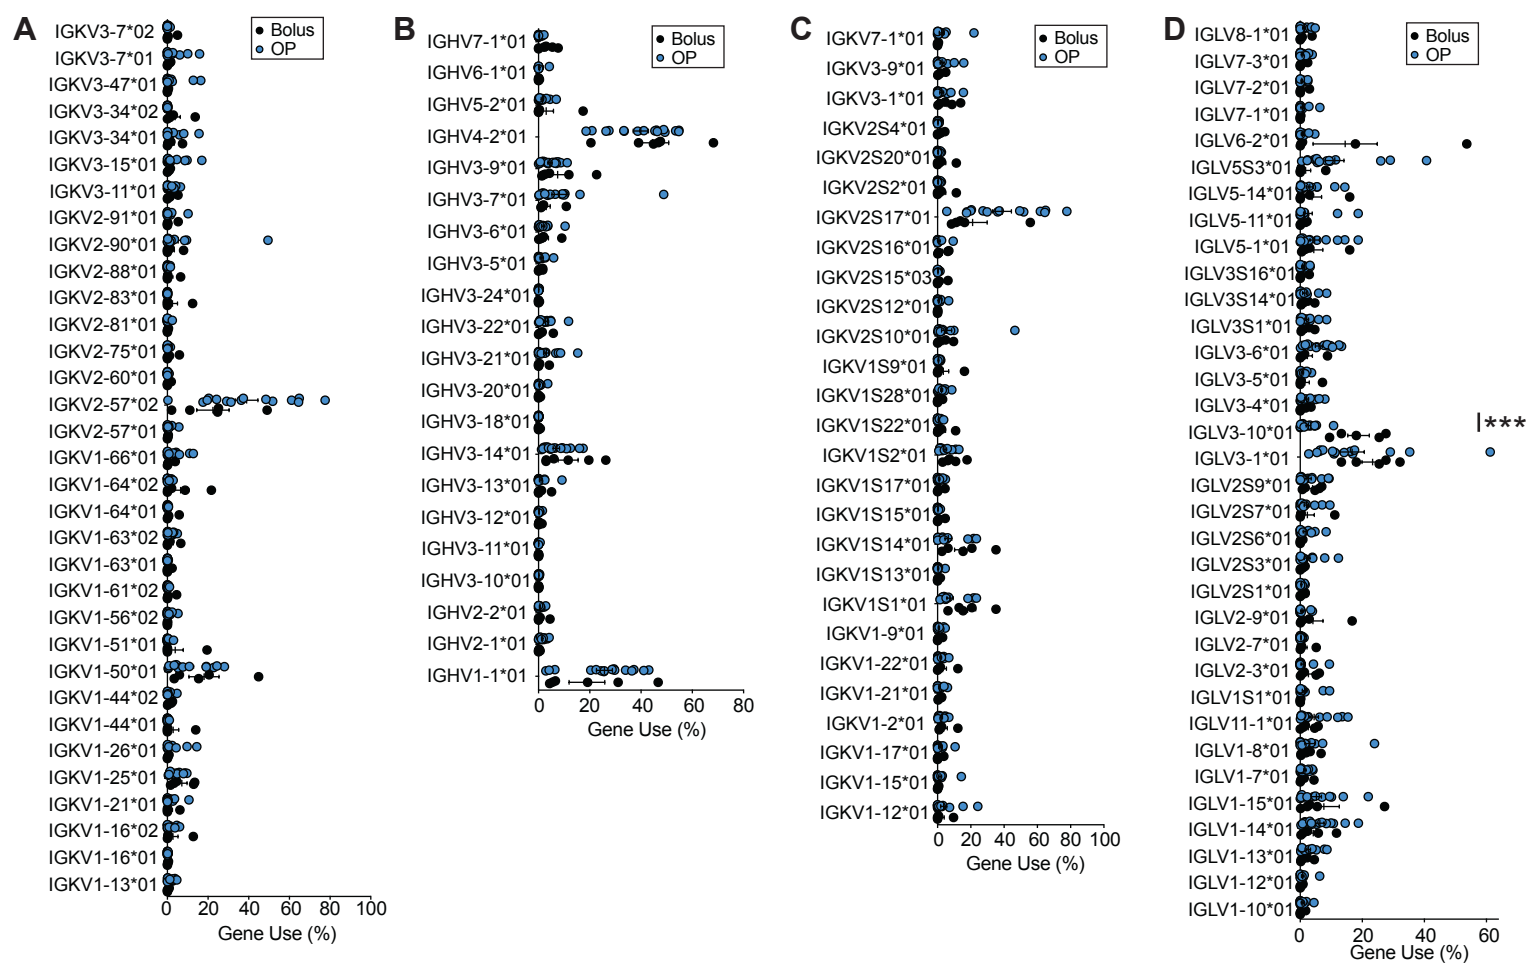

Supplement: NIHMS1528121-supplement-Figure_S4.pdf [file NIHMS1528121-supplement-Figure_S4.pdf]

Figure S5

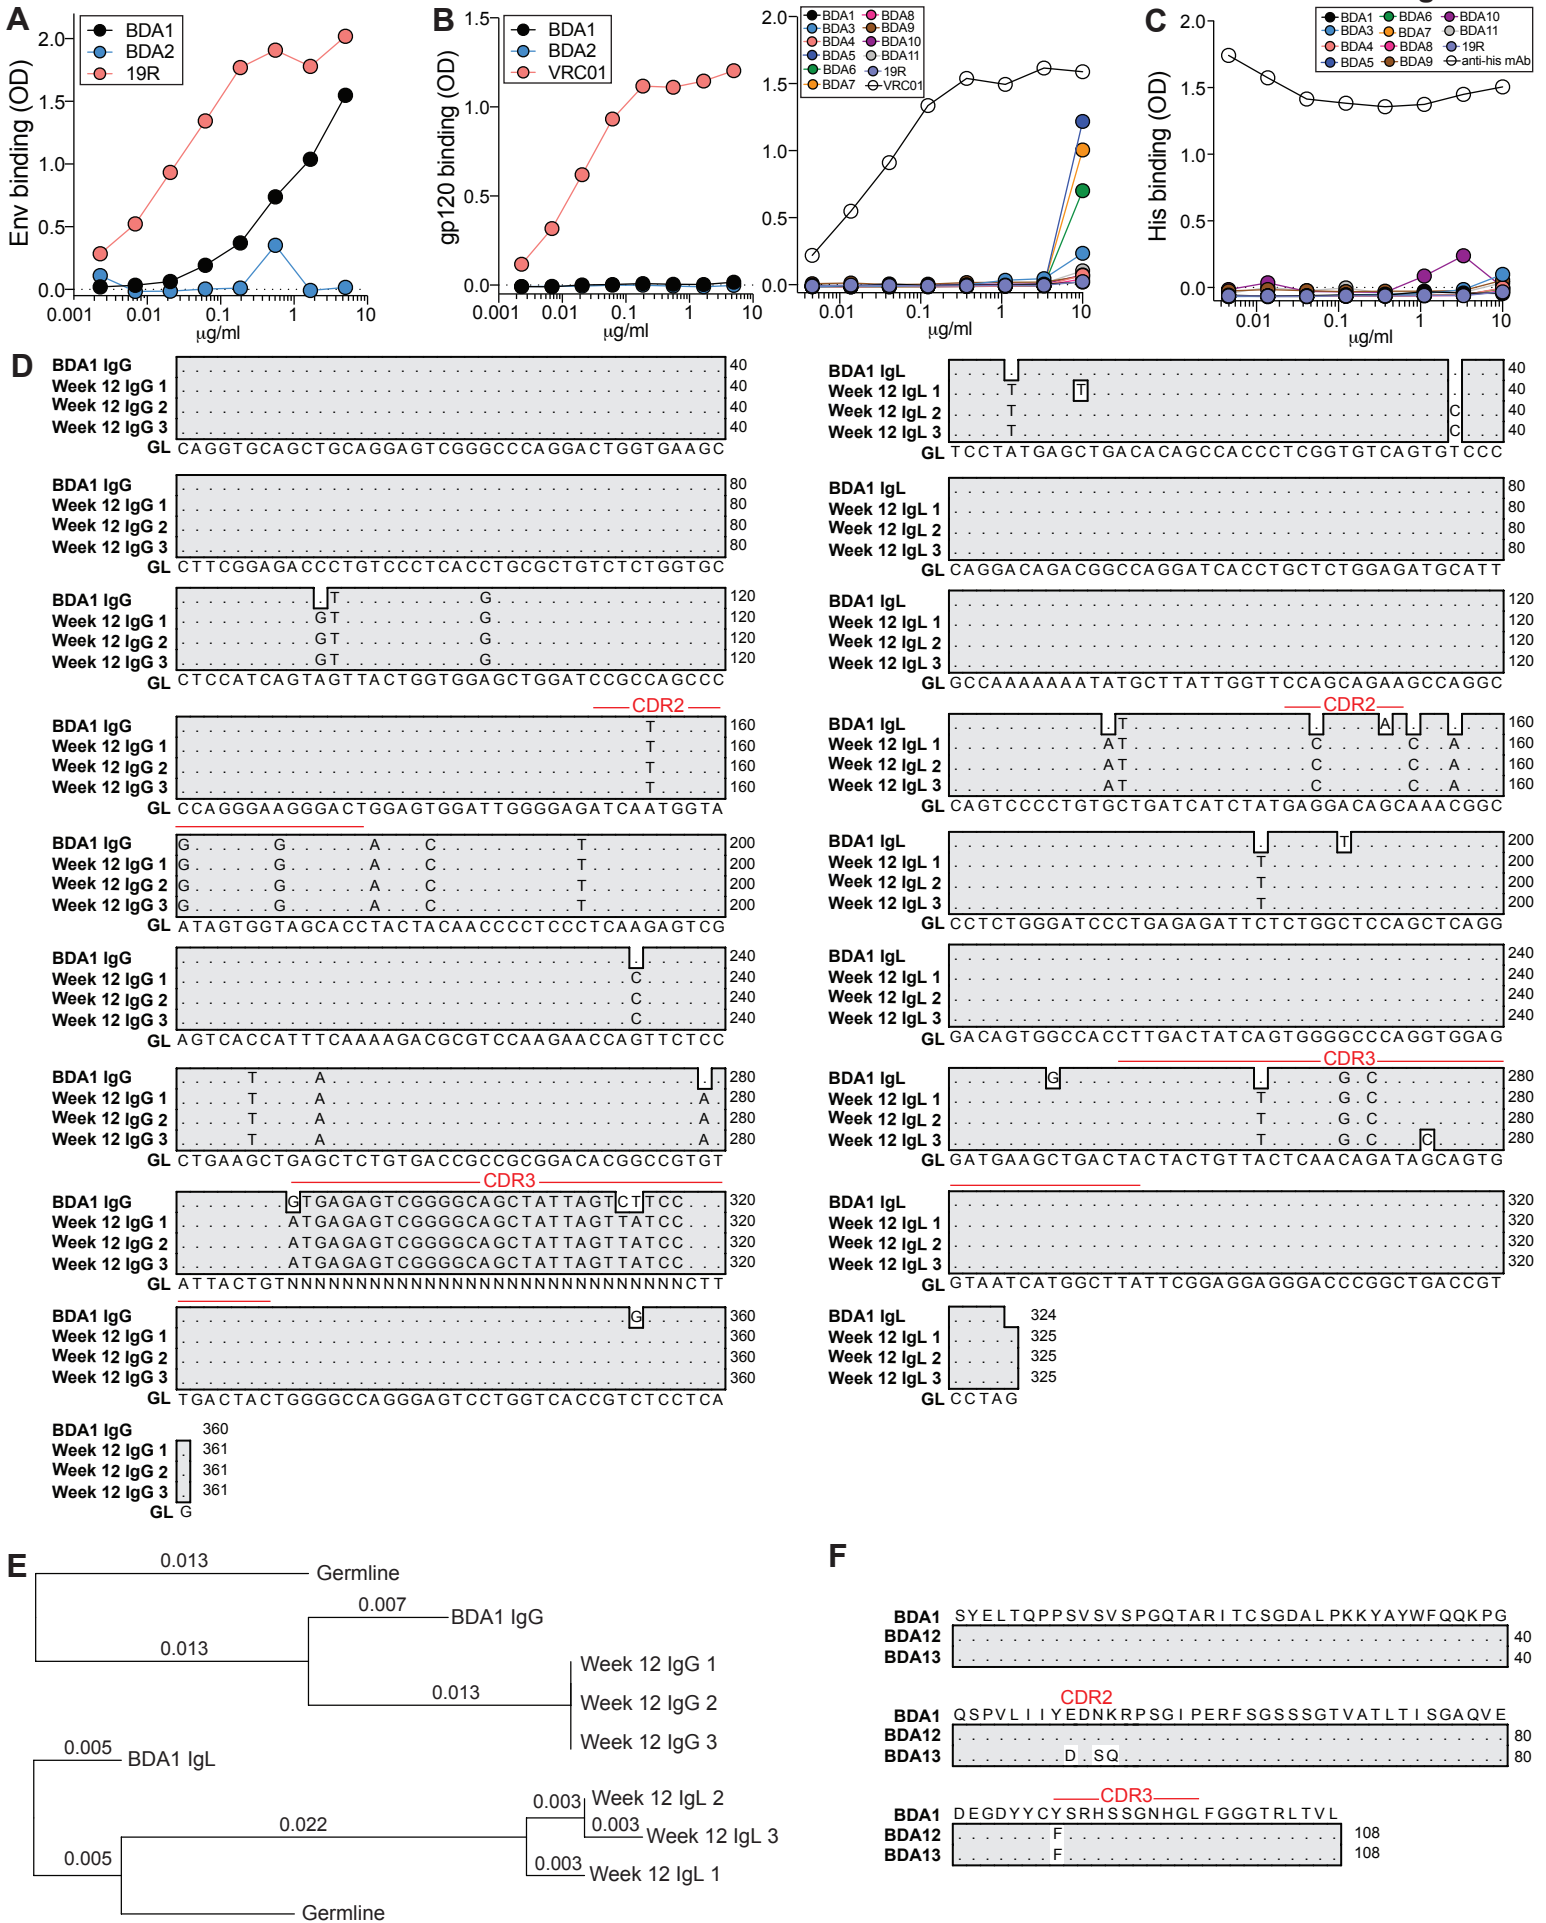

Supplement: NIHMS1528121-supplement-Figure_S5.pdf [file NIHMS1528121-supplement-Figure_S5.pdf]

**Bolus**

224-13

RCn16

RRk16

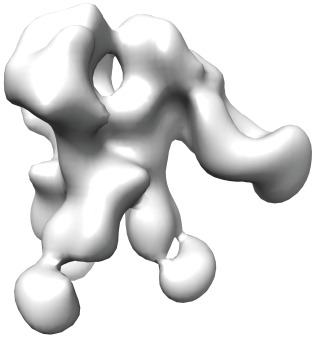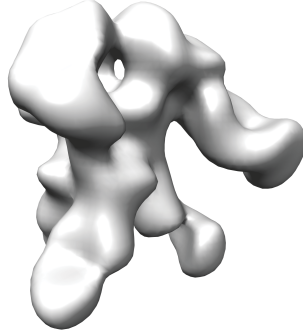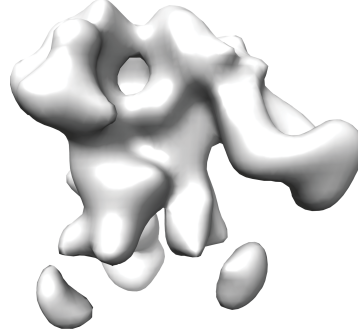

**2w OP**

RVh16

RYm16

RWr16

RQq16

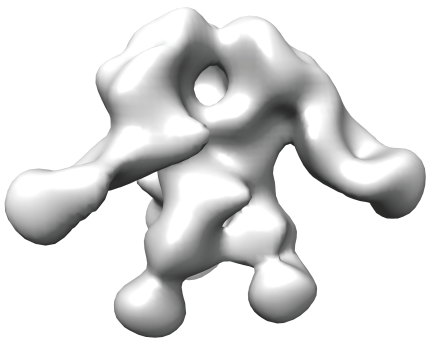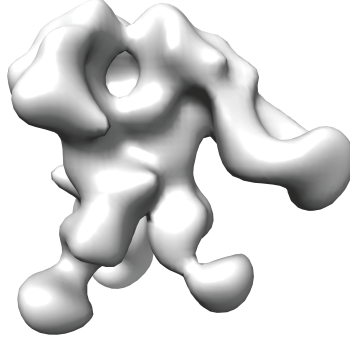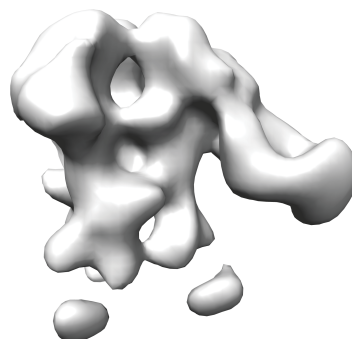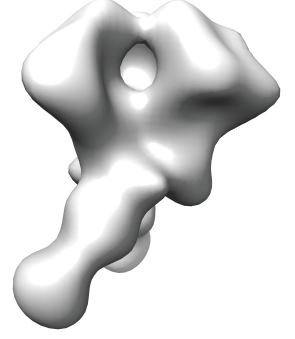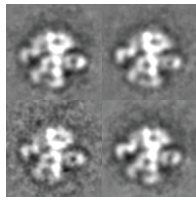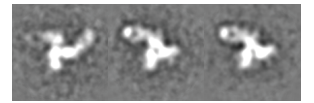

**4w OP**

RWh16

ROw16

RTh16

RFr16

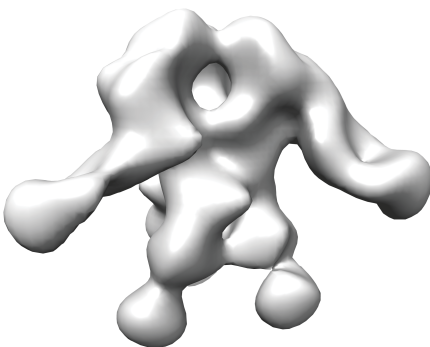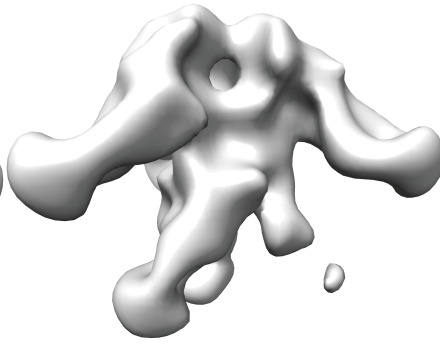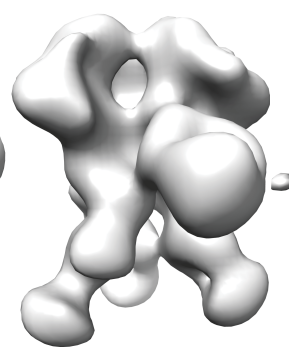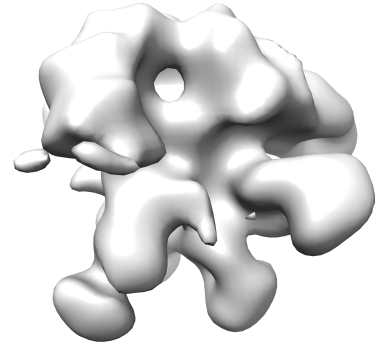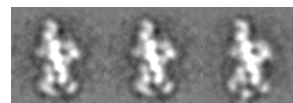

Supplement: NIHMS1528121-supplement-Figure_S6.pdf [file NIHMS1528121-supplement-Figure_S6.pdf]

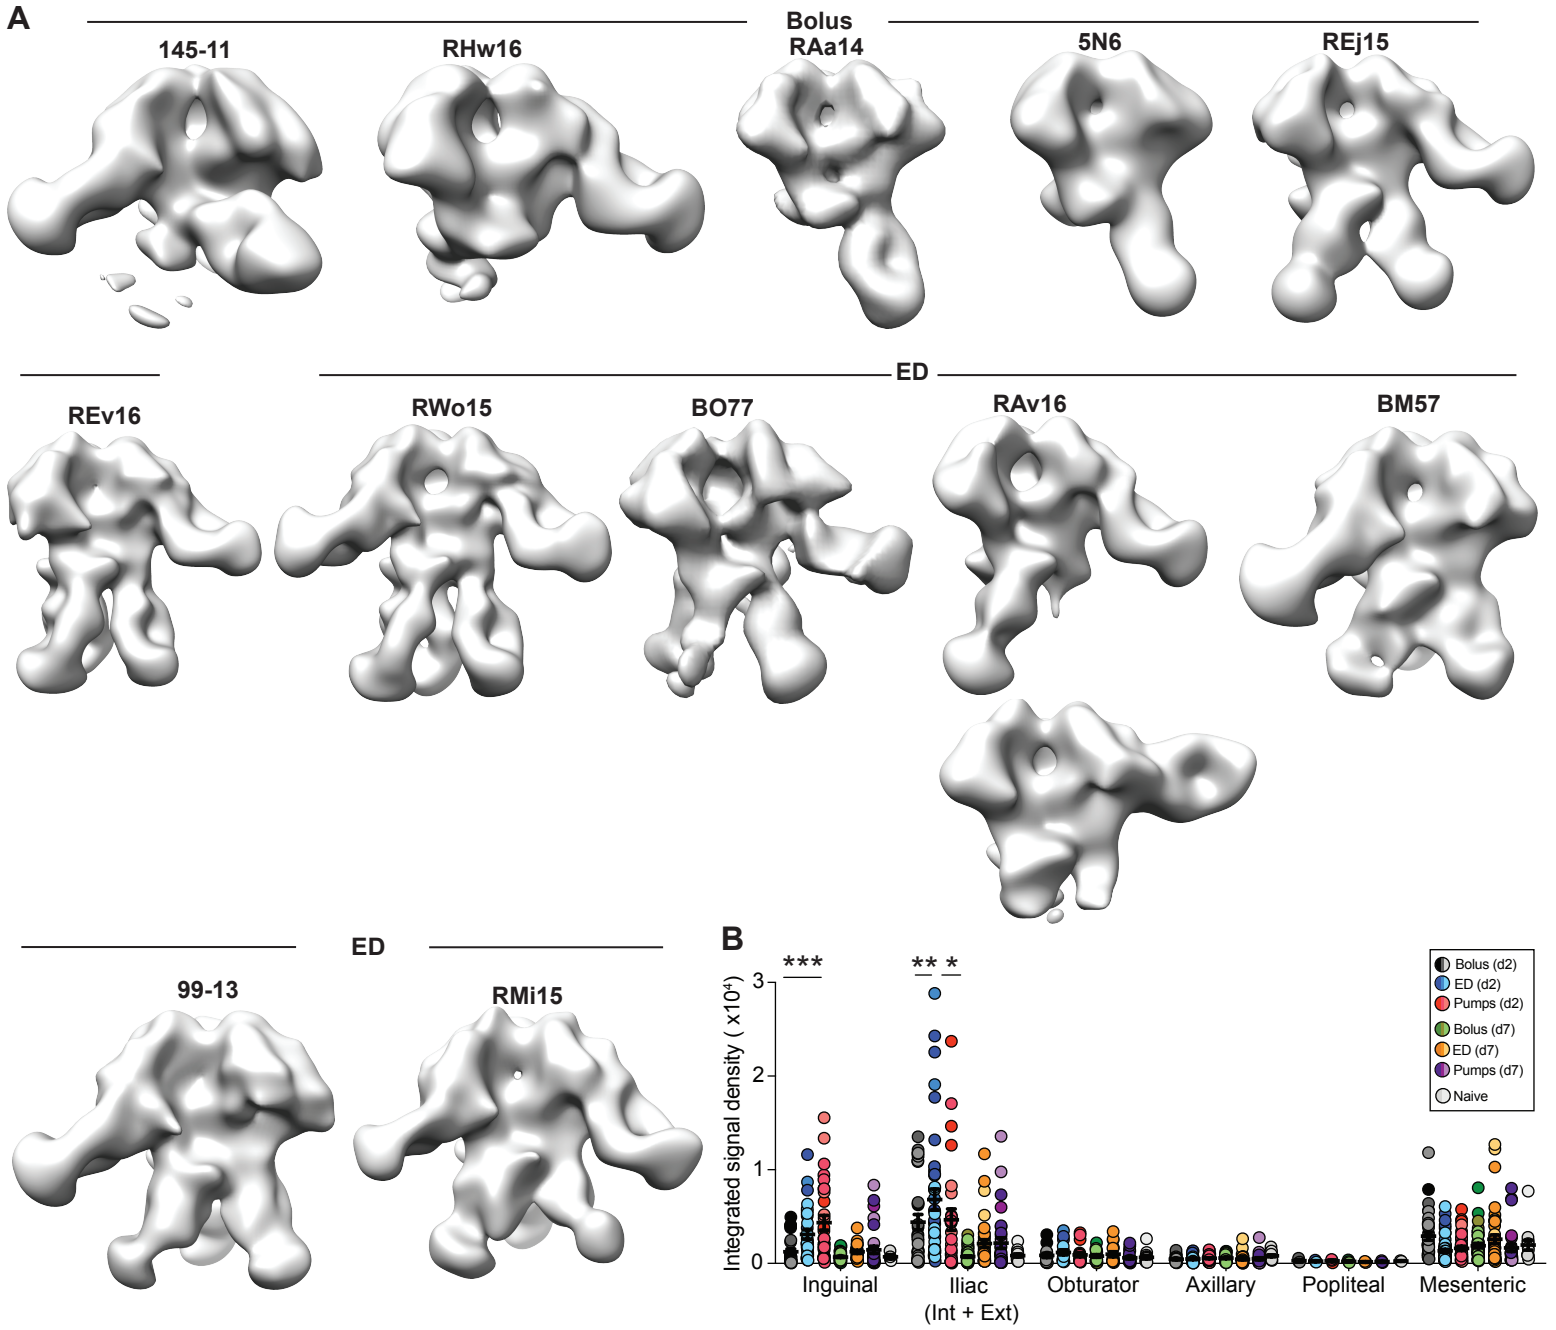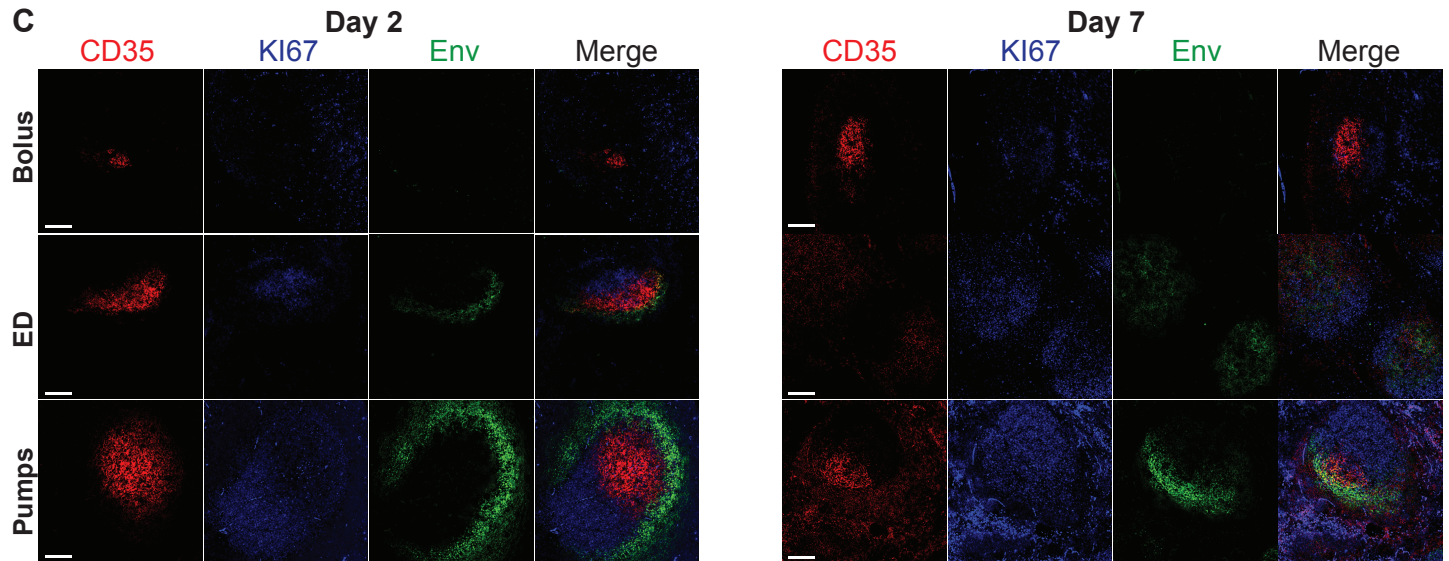

Supplement: NIHMS1528121-supplement-Figure_S8.pdf [file NIHMS1528121-supplement-Figure_S8.pdf]
